# Supplementary material for: Heterologous Ectoine Production inEscherichia coli: Optimization Using Response Surface Methodology
Source: Hindawi journal article supplement (doi:10.1155/2019/5475361), 2019-07-01
Supplement: f1 [file 5475361.f1.pdf]

Supplementary

Table 1. Experimental and predicted values of intracellular ectoine concentration produced by the recombinant *E. coli*

| Run Order      | Parameter       |              |                  | Ectoine concentration (g/L) |            |                |
|----------------|-----------------|--------------|------------------|-----------------------------|------------|----------------|
|                | Glucose (% w/v) | NaCl (% w/v) | Temperature (°C) | Experiment                  | Prediction | Standard Error |
| 1              | 0.3             | 1.4          | 30.0             | 0.045                       | 0.053      | 0.0020         |
| 2              | 1.0             | 1.4          | 30.0             | 0.052                       | 0.053      | 0.0020         |
| 3              | 1.0             | 1.4          | 30.0             | 0.053                       | 0.053      | 0.0020         |
| 4              | 0.6             | 0.6          | 21.1             | 0.030                       | 0.036      | 0.0033         |
| 5              | 0.6             | 2.2          | 38.9             | 0.053                       | 0.051      | 0.0033         |
| 6              | 0.6             | 2.2          | 21.1             | 0.029                       | 0.030      | 0.0033         |
| 7              | 1.0             | 1.4          | 15.0             | 0.031                       | 0.026      | 0.0044         |
| 8              | 1.4             | 0.6          | 38.9             | 0.009                       | 0.014      | 0.0033         |
| 9              | 1.4             | 0.6          | 21.1             | 0.037                       | 0.036      | 0.0033         |
| 10             | 1.0             | 1.4          | 30.0             | 0.053                       | 0.053      | 0.0020         |
| 11             | 0.6             | 0.6          | 38.9             | 0.025                       | 0.014      | 0.0033         |
| 12             | 1.0             | 2.7          | 30.0             | 0.034                       | 0.036      | 0.0044         |
| 13             | 1.0             | 1.4          | 30.0             | 0.056                       | 0.053      | 0.0020         |
| 14             | 1.4             | 2.2          | 21.1             | 0.028                       | 0.030      | 0.0033         |
| 15             | 1.4             | 2.2          | 38.9             | 0.056                       | 0.051      | 0.0033         |
| 16             | 1.0             | 1.4          | 30.0             | 0.063                       | 0.053      | 0.0020         |
| 17             | 1.0             | 1.4          | 30.0             | 0.050                       | 0.053      | 0.0020         |
| 18             | 1.0             | 1.4          | 45.0             | 0.019                       | 0.025      | 0.0044         |
| 19             | 1.0             | 0.1          | 30.0             | 0.009                       | 0.009      | 0.0044         |
| 20             | 1.7             | 1.4          | 30.0             | 0.053                       | 0.053      | 0.0020         |
| 1*             | 1.1             | 1.78         | 32               | 0.055                       | 0.055      |                |
| 2*             | 1.1             | 1.78         | 32               | 0.040                       | 0.055      |                |
| 3*             | 1.1             | 1.78         | 32               | 0.055                       | 0.055      |                |
| Average        |                 |              |                  | :                           | 0.050      |                |
| Standard error |                 |              |                  | :                           | 0.005      |                |

\*Expression and production of intracellular ectoine by the recombinant *E. coli* at the optimum value of glucose and NaCl levels and incubation temperature.

Table 2. Experimental and predicted values of extracellular ectoine concentration produced by the recombinant *E. coli*

| Run Order        | Parameter       |              |                  | Ectoine concentration (g/L) |            |                |
|------------------|-----------------|--------------|------------------|-----------------------------|------------|----------------|
|                  | Glucose (% w/v) | NaCl (% w/v) | Temperature (°C) | Experiment                  | Prediction | Standard Error |
| 1                | 0.3             | 1.4          | 30.0             | 0.264                       | 0.230      | 0.029          |
| 2                | 1.0             | 1.4          | 30.0             | 0.312                       | 0.274      | 0.015          |
| 3                | 1.0             | 1.4          | 30.0             | 0.328                       | 0.274      | 0.015          |
| 4                | 0.6             | 0.6          | 21.1             | 0.229                       | 0.235      | 0.020          |
| 5                | 0.6             | 2.2          | 38.9             | 0.117                       | 0.163      | 0.020          |
| 6                | 0.6             | 2.2          | 21.1             | 0.114                       | 0.091      | 0.020          |
| 7                | 1.0             | 1.4          | 15.0             | 0.086                       | 0.107      | 0.029          |
| 8                | 1.4             | 0.6          | 38.9             | 0.341                       | 0.292      | 0.020          |
| 9                | 1.4             | 0.6          | 21.1             | 0.211                       | 0.221      | 0.020          |
| 10               | 1.0             | 1.4          | 30.0             | 0.243                       | 0.274      | 0.015          |
| 11               | 0.6             | 0.6          | 38.9             | 0.270                       | 0.306      | 0.020          |
| 12               | 1.0             | 2.7          | 30.0             | 0.097                       | 0.084      | 0.029          |
| 13               | 1.0             | 1.4          | 30.0             | 0.244                       | 0.274      | 0.015          |
| 14               | 1.4             | 2.2          | 21.1             | 0.100                       | 0.078      | 0.020          |
| 15               | 1.4             | 2.2          | 38.9             | 0.121                       | 0.149      | 0.020          |
| 16               | 1.0             | 1.4          | 30.0             | 0.252                       | 0.274      | 0.015          |
| 17               | 1.0             | 1.4          | 30.0             | 0.265                       | 0.274      | 0.015          |
| 18               | 1.0             | 1.4          | 45.0             | 0.259                       | 0.227      | 0.029          |
| 19               | 1.0             | 0.1          | 30.0             | 0.323                       | 0.325      | 0.029          |
| 20               | 1.7             | 1.4          | 30.0             | 0.182                       | 0.206      | 0.029          |
| 1*               | 0.92            | 0.28         | 34               | 0.31                        | 0.34       |                |
| 2*               | 0.92            | 0.28         | 34               | 0.34                        | 0.34       |                |
| 3*               | 0.92            | 0.28         | 34               | 0.40                        | 0.34       |                |
| 4*               | 0.92            | 0.28         | 34               | 0.44                        | 0.34       |                |
| Average :        |                 |              |                  | 0.37                        |            |                |
| Standard error : |                 |              |                  | 0.027                       |            |                |

\*Expression and production of extracellular ectoine by the recombinant *E. coli* at the optimum value of glucose and NaCl levels and incubation temperature.

Table 3. Experimental and predicted values of the productivity of the recombinant *E. coli* producing intracellular ectoine

| Run Order | Parameter       |              |                  | Productivity (mg ectoine/g cdw) |            |                |
|-----------|-----------------|--------------|------------------|---------------------------------|------------|----------------|
|           | Glucose (% w/v) | NaCl (% w/v) | Temperature (°C) | Experiment                      | Prediction | Standard Error |
| 1         | 0.3             | 1.4          | 30.0             | 43.3                            | 40.2       | 4.8            |
| 2         | 1.0             | 1.4          | 30.0             | 29.3                            | 31.7       | 2.5            |
| 3         | 1.0             | 1.4          | 30.0             | 31.7                            | 31.7       | 2.5            |
| 4         | 0.6             | 0.6          | 21.1             | 34.2                            | 34.9       | 5.0            |
| 5         | 0.6             | 2.2          | 38.9             | 42.2                            | 43.3       | 5.0            |
| 6         | 0.6             | 2.2          | 21.1             | 109.9                           | 105.8      | 5.0            |
| 7         | 1.0             | 1.4          | 15.0             | 98.4                            | 106.2      | 4.8            |
| 8         | 1.4             | 0.6          | 38.9             | 5.2                             | 6.5        | 5.0            |
| 9         | 1.4             | 0.6          | 21.1             | 47.5                            | 43.6       | 5.0            |
| 10        | 1.0             | 1.4          | 30.0             | 32.6                            | 31.7       | 2.5            |
| 11        | 0.6             | 0.6          | 38.9             | 15.6                            | 20.8       | 5.0            |
| 12        | 1.0             | 2.7          | 30.0             | 88.0                            | 95.3       | 4.8            |
| 13        | 1.0             | 1.4          | 30.0             | 33.2                            | 31.7       | 2.5            |
| 14        | 1.4             | 2.2          | 21.1             | 139.4                           | 131.3      | 5.0            |
| 15        | 1.4             | 2.2          | 38.9             | 49.4                            | 45.8       | 5.0            |
| 16        | 1.0             | 1.4          | 30.0             | 35.7                            | 31.7       | 2.5            |
| 17        | 1.0             | 1.4          | 30.0             | 28.3                            | 31.7       | 2.5            |
| 18        | 1.0             | 1.4          | 45.0             | 26.3                            | 22.5       | 4.8            |
| 19        | 1.0             | 0.1          | 30.0             | 6.0                             | 2.6        | 4.8            |
| 20        | 1.7             | 1.4          | 30.0             | 42.6                            | 49.6       | 4.8            |

Table 4. Experimental and predicted values of extracellular ectoine concentration produced by the recombinant *E. coli*

| Run Order | Parameter           |                  | Ectoine Concentration (g/L) |            |                |
|-----------|---------------------|------------------|-----------------------------|------------|----------------|
|           | OD before induction | IPTG (mM)        | Experiment                  | Prediction | Standard Error |
| 1         | 0.4                 | 1.3              | 0.68                        | 0.66       | 0.028          |
| 2         | 0.8                 | 0.1              | 0.68                        | 0.65       | 0.028          |
| 3         | 1.1                 | 0.3              | 0.64                        | 0.66       | 0.028          |
| 4         | 0.4                 | 0.3              | 0.55                        | 0.58       | 0.028          |
| 5         | 0.8                 | 0.8              | 0.68                        | 0.68       | 0.016          |
| 6         | 0.8                 | 0.8              | 0.66                        | 0.68       | 0.016          |
| 7         | 0.8                 | 0.8              | 0.73                        | 0.68       | 0.016          |
| 8         | 0.8                 | 0.8              | 0.66                        | 0.68       | 0.016          |
| 9         | 1.1                 | 1.3              | 0.48                        | 0.45       | 0.028          |
| 10        | 0.8                 | 0.8              | 0.69                        | 0.68       | 0.016          |
| 11        | 1.2                 | 0.8              | 0.53                        | 0.53       | 0.028          |
| 12        | 0.3                 | 0.8              | 0.62                        | 0.62       | 0.028          |
| 13        | 0.8                 | 1.5              | 0.53                        | 0.56       | 0.028          |
| 1*        | 0.74                | 0.62             | 0.71                        | 0.69       |                |
| 2*        | 0.74                | 0.62             | 0.77                        | 0.69       |                |
| 3*        | 0.74                | 0.62             | 0.64                        | 0.69       |                |
| 4*        | 0.74                | 0.62             | 0.73                        | 0.69       |                |
|           |                     | Average :        | 0.71                        |            |                |
|           |                     | Standard error : | 0.03                        |            |                |

\*Expression and production of extracellular ectoine by the recombinant *E. coli* at the optimum value of OD before induction and the final concentration of IPTG.

Table 5. Experimental and predicted values of the productivity of the recombinant *E. coli* producing extracellular ectoine

| Run Order | Parameter           |                | Productivity (mg ectoine/g cdw) |            |                |
|-----------|---------------------|----------------|---------------------------------|------------|----------------|
|           | OD before induction | IPTG (mM)      | Experiment                      | Prediction | Standard Error |
| 1         | 0.4                 | 1.3            | 363.1                           | 349.4      | 11.5           |
| 2         | 0.8                 | 0.1            | 291.8                           | 291.6      | 11.5           |
| 3         | 1.1                 | 0.3            | 279.3                           | 289.0      | 11.5           |
| 4         | 0.4                 | 0.3            | 312.0                           | 301.4      | 11.5           |
| 5         | 0.8                 | 0.8            | 318.3                           | 306.4      | 6.5            |
| 6         | 0.8                 | 0.8            | 301.5                           | 306.4      | 6.5            |
| 7         | 0.8                 | 0.8            | 320.8                           | 306.4      | 6.5            |
| 8         | 0.8                 | 0.8            | 293.9                           | 306.4      | 6.5            |
| 9         | 1.1                 | 1.3            | 203.7                           | 210.3      | 11.5           |
| 10        | 0.8                 | 0.8            | 297.3                           | 306.4      | 6.5            |
| 11        | 1.2                 | 0.8            | 253.1                           | 240.7      | 11.5           |
| 12        | 0.3                 | 0.8            | 331.5                           | 347.9      | 11.5           |
| 13        | 0.8                 | 1.5            | 265.8                           | 270.0      | 11.5           |
| 1*        | 0.3                 | 1.5            | 372.7                           | 374.8      |                |
| 2*        | 0.3                 | 1.5            | 379.3                           | 374.8      |                |
| 3*        | 0.3                 | 1.5            | 380.5                           | 374.8      |                |
| 4*        | 0.3                 | 1.5            | 371.1                           | 374.8      |                |
|           |                     | Average        | : 375.9                         |            |                |
|           |                     | Standard error | : 2.3                           |            |                |

\*Expression and production of extracellular ectoine by the recombinant *E. coli* at the optimum value of glucose and NaCl levels and incubation temperature.
